# Supplementary material
Source: Elsevier journal article supplement (https://www.sciencedirect.com/science/article/pii/S113400961730061X)
Supplement: mmc1 [file S113400961730061X:mmc1.docx]

**Anexo 1: Pacientes intervenidos quirúrgicamente por patología vascular renal**

|  | 1 | 2 | 3 | 4 | 5 | 6 | 7 | 8 | 9 | 10 |
| --- | --- | --- | --- | --- | --- | --- | --- | --- | --- | --- |
| Edad (años) | 60 | 57 | 69 | 60 | 36 | 21 | 56 | 70 | 63 | 27 |
| Sexo |  |  |  |  |  |  |  |  |  |  |
| Hombre |  |  | x |  |  |  |  |  |  |  |
| Mujer | x | x |  | x | x | x | x | x | x | x |
| Peso (kg.) | 60 | 50 | 100 | 73 | 72.5 | 54 | 75 | 60 | 74 | 56 |
| Antecedentes |  |  |  |  |  |  |  |  |  |  |
| HTA | x | x | x |  | x | x | x | x | x | x |
| DM |  |  | x | x |  |  |  |  |  |  |
| Tabaquismo | x |  |  |  |  |  |  |  | x |  |
| IRA |  |  |  |  |  |  |  |  |  | x |
| IRC |  | x | x |  |  |  |  |  |  |  |
| AAA |  |  | x |  |  |  |  |  | x |  |
| Vasculitis |  |  |  |  |  |  |  |  |  | x |
| Monorreno |  |  | x |  |  |  | x |  |  |  |
| Fibrodisplasia | x | x |  | x |  |  | x | x |  |  |
| *Stents* previos en AR |  | x |  |  |  | x |  |  |  | x |
| Cirugía previa de AR |  |  |  |  |  |  |  |  | x |  |
| Valores de laboratorio pre operatorios | | |  |  |  |  |  |  |  |  |
| Urea (mg/dL) | 28 | 86 | 63 | 33 | 19 | 22 | 41 | 40 | 70 | 263 |
| Creatinina (mg/dL) | 0.8 | 2 | 1.2 | 0.9 | 0.6 | 0.6 | 0.8 | 0.5 | 1.1 | 5.8 |
| Aclaramiento de creatinina (mL/min) | 70.83 | 24.5 | 82.2 | 76.6 | 148.4 | 126.4 | 93.0 | 99.2 | 61.2 | 12.9 |
| Diagnóstico | Aneurisma ARI + MAV congénita | Estenosis *stents* ARD y ARI | AAA + oclusión ARD | Aneurisma ARI | Aneurisma ARD | Estenosis leve de *stent* en ARD y estenosis severa + fractura de *stent* en ARI | Aneurisma ARI y rama polar superior | Aneurisma de ARD + lesión severa | AAA con estenosis ARI | Estenosis *stents* renal bilateral |
| Cirugía | Nefrectomía izquierda + conexión de MAV renal + implante en flanco derecho (autotrasplante) | *Bypass* iliaco renal bilateral + reimplante polar inferior derecha en vena safena | *Bypass* aorto aórtico abdominal + *bypass* mesentérico superior renal derecho | Reconstrucción de ARI + autotrasplante renal izquierdo en vasos iliacos | Plástica de arteria renal derecha | *Bypass* aorto-renal izquierdo | Reconstrucción de arteria renal izquierda con parche de vena safena + reimplante de arteria polar superior en vena safena | *Bypass* mesentérico superior-renal derecha + reimplante de arteria polar | *Bypass* aorto aórtico y *bypass* mesentérico superior-renal izquierdo | *Bypass* aorto-renal bilateral con safena |
| Injerto utilizado |  | Safena | Safena |  |  | Safena | Safena | Safena | Tubo de ePTFE de 6 mm (Propaten®) | Safena |
|  |  |  | Tubo Dacron 24 mm (InterGard®) |  |  |  |  |  | Tubo Dacron 24 mm (InterGard®) |  |
| Protección | Euro-Collins |  |  | HTK de Bretschneider |  |  | HTK de Bretschneider | HTK de Bretschneider | HTK de Bretschneider |  |
| Tiempo de isquemia (min.) |  |  |  |  | 14 | 25 | 60 |  |  |  |
| Días de internación | 9 | 8 | 9 | 7 | 8 | 6 | 17 | 5 | 10 | 13 |
| Valores de laboratorio post operatorios | | |  |  |  |  |  |  |  |  |
| Urea (mg/dL) | 24 | 75 | 49 | 10 | 19 | 33 | 18 | 47 | 35 | 50 |
| Creatinina (mg/dL) | 0.5 | 2.4 | 1 | 0.4 | 0.6 | 0.5 | 1.1 | 0.6 | 1 | 2.2 |
| Aclaramiento de creatinina (mL/min) | 133.33 | 24.02 | 98.61 | 202.78 | 174.54 | 178.5 | 79.55 | 97.22 | 79.14 | 39.95 |
| Tiempo de seguimiento (años) | 16.1 | 11.3 | 6.7 | 5.5 | 5.2 | 4.6 | 4.4 | 1.6 | 1.3 | 1.1 |
| AAA: aneurisma de aorta abdominal, AR: arteria renal, ARD: arteria renal derecha, ARI: arteria renal izquierda, DM: diabetes mellitus, ePTFE: politetrafluoroetileno expandido, MAV: malformación arterio venosa, HTA: hipertensión arterial, IRA: insuficiencia renal aguda, IRC: insuficiencia renal crónica. | | | | | | | | | | |
